# Supplementary material for: G:U-Independent RNA Minihelix Aminoacylation by Nanoarchaeum equitans Alanyl-tRNA Synthetase: An Insight into the Evolution of Aminoacyl-tRNA Synthetases
Source: PubMed Central journal article supplement — J Mol Evol. 2020 May 7;88(6):501–9. doi: 10.1007/s00239-020-09945-1 (PMC11392972; doi:10.1007/s00239-020-09945-1), 2020-05-07
Supplement: 239_2020_9945_MOESM1_ESM.pdf [file 239_2020_9945_MOESM1_ESM.pdf]

Supplementary Material for

**G:U-Independent RNA Minihelix Aminoacylation by *Nanoarchaeum equitans* Alanine-tRNA Synthetase: An Insight into the Evolution of Aminoacyl-tRNA Synthetases**

Misa Arutaki<sup>1,†</sup>, Ryodai Kurihara<sup>1,†</sup>, Toru Matsuoka<sup>1</sup>, Ayako Inami<sup>1</sup>, Kei Tokunaga<sup>1</sup>, Tomomasa Ohno<sup>1</sup>, Hiroki Takahashi<sup>1</sup>, Haruka Takano<sup>1</sup>, Tadashi Ando<sup>2,3</sup>, Hiromi Mutsuro-Aoki<sup>1</sup>, Takuya Umehara<sup>1</sup>, and Koji Tamura<sup>1,3,\*</sup>

<sup>1</sup>Department of Biological Science and Technology, Tokyo University of Science, 6-3-1 Nijuku, Katsushika-ku, Tokyo 125-8585, Japan

<sup>2</sup>Department of Applied Electronics, Tokyo University of Science, 6-3-1 Nijuku, Katsushika-ku, Tokyo 125-8585, Japan

<sup>3</sup>Research Institute for Science and Technology, Tokyo University of Science, 2641 Yamazaki, Noda, Chiba 278-8510, Japan

<sup>†</sup>Misa Arutaki and Ryodai Kurihara have contributed equally to this work.

<sup>\*</sup>To whom correspondence may be addressed. Email: [koji@rs.tus.ac.jp](mailto:koji@rs.tus.ac.jp)

**This PDF file includes:**

Fig. S1

Fig. S2

References



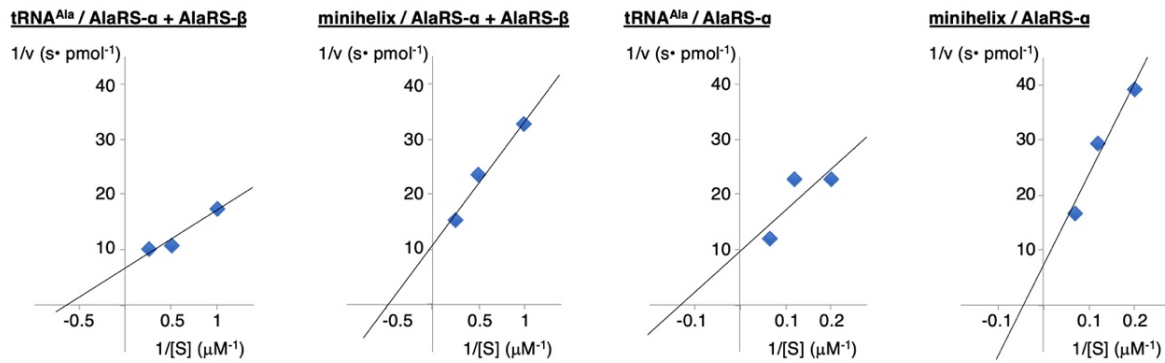

**Fig. S2** A Lineweaver-Burk plot of  $1/v$  against  $1/[S]$  ( $[S]$  indicates the RNA concentration and  $v$  indicates the observed initial velocity of alanylation) in alanylation of tRNA<sup>Ala</sup> and minihelix<sup>Ala</sup> by a combination of *N. equitans* AlaRS-α and AlaRS-β, and by AlaRS-α alone.

## References

- Robert X, Gouet P (2014) Deciphering key features in protein structures with the new ENDscript server. *Nucleic Acids Res* 42:W1
- Sievers F, Wilm A, Dineen D, Gibson TJ, Karplus K, Li W, Lopez R, McWilliam H, Remmert M, Söding J, Thompson JD, Higgins DG (2011) Fast, scalable generation of high-quality protein multiple sequence alignments using Clustal Omega. *Mol Syst Biol* 7:539
